# Supplementary material
Source: PubMed Central journal article supplement (PMC5937525)

## **Supplemental Data**

### Contents:

Supplemental Table 1. Variants in insulin-30 instrument sets

Supplemental Table 2. Variants in BMI instrument set

Supplemental Table 3. Individual variant association in CAMP-MGH cohort with insulin-30

Supplemental Table 4. Summary of bidirectional Mendelian randomization analyses.

Supplemental Figure 1. SNP-trait effect estimates for insulin-30-stringent instruments.

| <b>Supplemental Table 1. Variants in insulin-30 instrument sets</b> |            |                      |                     |                               |                     |             |                |                             |                           |                       |
|---------------------------------------------------------------------|------------|----------------------|---------------------|-------------------------------|---------------------|-------------|----------------|-----------------------------|---------------------------|-----------------------|
| <b>SNP rsID</b>                                                     | <b>Chr</b> | <b>Position (bp)</b> | <b>Nearest gene</b> | <b>Insulin raising allele</b> | <b>Other allele</b> | <b>beta</b> | <b>p-value</b> | <b>Insulin-30-stringent</b> | <b>Insulin-30-relaxed</b> | <b>GSIS-stringent</b> |
| <b>rs1111875</b>                                                    | 10         | 94452862             | HHEX                | T                             | C                   | 0.095       | 7.50E-11       | Yes                         | Yes                       | Yes                   |
| <b>rs2287019</b>                                                    | 19         | 50894012             | QPCTL               | C                             | T                   | 0.12        | 1.49E-09       | Yes                         | Yes                       | Yes                   |
| <b>rs742642</b>                                                     | 6          | 20773060             | CDKAL1              | G                             | A                   | 0.12        | 7.69E-09       | Yes                         | Yes                       | Yes                   |
| <b>rs6943153</b>                                                    | 7          | 50759073             | GRB10               | T                             | C                   | 0.082       | 5.48E-08       |                             | Yes                       |                       |
| <b>rs10830963</b>                                                   | 11         | 92348358             | MTNR1B              | C                             | G                   | 0.085       | 2.04E-07       |                             | Yes                       | Yes                   |
| <b>rs6006427</b>                                                    | 22         | 28999993             | OSM                 | C                             | T                   | 0.11        | 3.86E-06       |                             | Yes                       |                       |
| <b>rs4942511</b>                                                    | 13         | 45798649             | C13orf18            | C                             | T                   | 0.33        | 7.85E-06       |                             | Yes                       |                       |
| <b>rs10233248</b>                                                   | 7          | 49445212             | VWC2                | A                             | T                   | 0.11        | 8.90E-06       |                             | Yes                       |                       |
| <b>rs17044912</b>                                                   | 3          | 6462627              | AF279782            | C                             | T                   | 0.25        | 1.06E-05       |                             | Yes                       |                       |
| <b>rs2274611</b>                                                    | 9          | 89532495             | CTSL                | C                             | T                   | 0.093       | 1.32E-05       |                             | Yes                       |                       |
| <b>rs6740210</b>                                                    | 2          | 65017249             | SLC1A4              | T                             | C                   | 0.17        | 1.59E-05       |                             | Yes                       |                       |
| <b>rs2865851</b>                                                    | 19         | 58907560             | MIR519D             | G                             | A                   | 0.15        | 1.68E-05       |                             | Yes                       |                       |
| <b>rs7581860</b>                                                    | 2          | 204940565            | PARD3B              | A                             | G                   | 0.2         | 1.69E-05       |                             | Yes                       |                       |
| <b>rs918689</b>                                                     | 16         | 74755148             | CNTNAP4             | G                             | A                   | 0.099       | 1.77E-05       |                             | Yes                       |                       |
| <b>rs11240131</b>                                                   | 1          | 145751075            | NBPF1 /KIAA1693     | C                             | T                   | 0.13        | 1.98E-05       |                             | Yes                       |                       |
| <b>rs2388417</b>                                                    | 15         | 92192224             | LINC01579           | T                             | C                   | 0.36        | 2.14E-05       |                             | Yes                       |                       |
| <b>rs1239081</b>                                                    | 2          | 78683501             | AC092660            | G                             | A                   | 0.1         | 2.14E-05       |                             | Yes                       |                       |
| <b>rs10834748</b>                                                   | 11         | 25668301             | LUZP2               | A                             | T                   | 0.13        | 2.17E-05       |                             | Yes                       |                       |
| <b>rs3759356</b>                                                    | 12         | 5020623              | KCNA5               | A                             | G                   | 0.11        | 2.35E-05       |                             | Yes                       |                       |

|                   |    |           |             |   |   |       |          |  |     |     |
|-------------------|----|-----------|-------------|---|---|-------|----------|--|-----|-----|
| <b>rs13152357</b> | 4  | 153091882 | RP11-73G16  | C | T | 0.4   | 2.37E-05 |  | Yes |     |
| <b>rs1265052</b>  | 6  | 31188450  | C6ORF15     | C | T | 0.092 | 2.39E-05 |  | Yes |     |
| <b>rs210328</b>   | 14 | 53135415  | AL163953    | C | T | 0.11  | 2.44E-05 |  | Yes |     |
| <b>rs7607980</b>  | 2  | 165259447 | COBLL1      | T | C | 0.097 | 2.49E-05 |  | Yes |     |
| <b>rs11768772</b> | 7  | 12881672  | RN7SKP228   | G | C | 0.26  | 2.54E-05 |  | Yes |     |
| <b>rs12549902</b> | 8  | 41628416  | NKX6-3      | G | A | 0.045 | 2.66E-05 |  | Yes | Yes |
| <b>rs2909874</b>  | 5  | 85371948  | NBPF22P     | A | G | 0.099 | 2.92E-05 |  | Yes |     |
| <b>rs7046518</b>  | 9  | 19409446  | ACER2       | A | G | 0.11  | 2.94E-05 |  | Yes |     |
| <b>rs4918546</b>  | 10 | 112384883 | RN7SL686P   | G | T | 0.14  | 3.23E-05 |  | Yes |     |
| <b>rs368664</b>   | 1  | 218953658 | C1orf115    | A | C | 0.28  | 3.77E-05 |  | Yes |     |
| <b>rs1073923</b>  | 16 | 77416394  | WVOX        | T | C | 0.19  | 3.77E-05 |  | Yes |     |
| <b>rs11675522</b> | 2  | 3130664   | AC019118    | T | C | 0.099 | 3.83E-05 |  | Yes |     |
| <b>rs925820</b>   | 3  | 2843988   | CNTN4       | T | G | 0.099 | 3.99E-05 |  | Yes |     |
| <b>rs16877965</b> | 8  | 31371846  | WRN         | A | G | 0.21  | 4.01E-05 |  | Yes |     |
| <b>rs9364646</b>  | 6  | 162629938 | PARK2       | A | G | 0.14  | 4.13E-05 |  | Yes |     |
| <b>rs7573433</b>  | 2  | 165835109 | SCN2A       | A | G | 0.15  | 4.25E-05 |  | Yes |     |
| <b>rs6601952</b>  | 10 | 5403634   | UCN3        | C | A | 0.097 | 4.52E-05 |  | Yes |     |
| <b>rs7100825</b>  | 10 | 125309032 | CR607950    | T | C | 0.18  | 4.80E-05 |  | Yes |     |
| <b>rs10223660</b> | 6  | 2966865   | NQO2        | C | T | 0.11  | 4.81E-05 |  | Yes |     |
| <b>rs987192</b>   | 2  | 23286093  | hCG_1783917 | T | C | 0.27  | 4.86E-05 |  | Yes |     |
| <b>rs10811661</b> | 9  | 22124094  | CDKN2BAS    | C | T | 0.079 | 5.00E-05 |  | Yes |     |
| <b>rs933360</b>   | 7  | 50725739  | ANK1        | G | A | 0.033 | 1.40E-04 |  |     | Yes |
| <b>rs4502156</b>  | 15 | 60170447  | GRB10       | C | T | 0.045 | 2.10E-03 |  |     | Yes |

Beta refers to the association of each variant with log-insulin 30. Abbreviations: Chr, chromosome; SNP, single nucleotide polymorphism.

| <b>Supplemental Table 2, Variants in BMI instrument set</b> |            |                 |                     |                              |                     |             |                |
|-------------------------------------------------------------|------------|-----------------|---------------------|------------------------------|---------------------|-------------|----------------|
| <b>SNP</b>                                                  | <b>Chr</b> | <b>Position</b> | <b>Nearest gene</b> | <b>BMI increasing allele</b> | <b>Other allele</b> | <b>beta</b> | <b>P-value</b> |
| <b>rs1558902</b>                                            | 16         | 52361075        | FTO                 | A                            | T                   | 0.0818      | 7.51E-153      |
| <b>rs6567160</b>                                            | 18         | 55980115        | MC4R                | C                            | T                   | 0.0556      | 3.93E-53       |
| <b>rs13021737</b>                                           | 2          | 622348          | TMEM18              | G                            | A                   | 0.0601      | 1.113E-50      |
| <b>rs10938397</b>                                           | 4          | 44877284        | GNPDA2              | G                            | A                   | 0.0402      | 3.205E-38      |
| <b>rs543874</b>                                             | 1          | 176156103       | SEC16B              | G                            | A                   | 0.0482      | 2.618E-35      |
| <b>rs2207139</b>                                            | 6          | 50953449        | TFAP2B              | G                            | A                   | 0.0447      | 4.126E-29      |
| <b>rs11030104</b>                                           | 11         | 27641093        | BDNF                | A                            | G                   | 0.0414      | 5.557E-28      |
| <b>rs3101336</b>                                            | 1          | 72523773        | NEGR1               | C                            | T                   | 0.0334      | 2.661E-26      |
| <b>rs7138803</b>                                            | 12         | 48533735        | BCDIN3D             | A                            | G                   | 0.0315      | 8.153E-24      |
| <b>rs10182181</b>                                           | 2          | 25003800        | ADCY3               | G                            | A                   | 0.0307      | 8.777E-24      |
| <b>rs3888190</b>                                            | 16         | 28796987        | ATP2A1              | A                            | C                   | 0.0309      | 3.14E-23       |
| <b>rs1516725</b>                                            | 3          | 187306698       | ETV5                | C                            | T                   | 0.0451      | 1.886E-22      |
| <b>rs12446632</b>                                           | 16         | 19842890        | GPRC5B              | G                            | A                   | 0.0403      | 1.477E-18      |
| <b>rs2287019</b>                                            | 19         | 50894012        | QPCTL               | C                            | T                   | 0.036       | 4.585E-18      |
| <b>rs16951275</b>                                           | 15         | 65864222        | MAP2K5              | T                            | C                   | 0.0311      | 1.911E-17      |
| <b>rs3817334</b>                                            | 11         | 47607569        | MTCH2               | T                            | C                   | 0.0262      | 5.145E-17      |
| <b>rs2112347</b>                                            | 5          | 75050998        | POC5                | T                            | G                   | 0.0261      | 6.191E-17      |
| <b>rs12566985</b>                                           | 1          | 74774781        | FPGT                | G                            | A                   | 0.0242      | 3.282E-15      |
| <b>rs3810291</b>                                            | 19         | 52260843        | ZC3H4               | A                            | G                   | 0.0283      | 4.812E-15      |
| <b>rs7141420</b>                                            | 14         | 78969207        | NRXN3               | T                            | C                   | 0.0235      | 1.23E-14       |
| <b>rs13078960</b>                                           | 3          | 85890280        | CADM2               | G                            | T                   | 0.0297      | 1.737E-14      |
| <b>rs10968576</b>                                           | 9          | 28404339        | LINGO2              | G                            | A                   | 0.0249      | 6.607E-14      |

|                   |    |           |           |   |   |        |             |
|-------------------|----|-----------|-----------|---|---|--------|-------------|
| <b>rs17024393</b> | 1  | 109956211 | GNAT2     | C | T | 0.0658 | 7.029E-14   |
| <b>rs12429545</b> | 13 | 53000207  | OLFM4     | A | G | 0.0334 | 1.094E-12   |
| <b>rs13107325</b> | 4  | 103407732 | SLC39A8   | T | C | 0.0477 | 1.825E-12   |
| <b>rs11165643</b> | 1  | 96696685  | PTBP2     | T | C | 0.0218 | 2.07E-12    |
| <b>rs17405819</b> | 8  | 76969139  | HNF4G     | T | C | 0.0224 | 2.07E-11    |
| <b>rs1016287</b>  | 2  | 59159129  | LINC01122 | T | C | 0.0229 | 2.253E-11   |
| <b>rs4256980</b>  | 11 | 8630515   | TRIM66    | G | C | 0.0209 | 2.9E-11     |
| <b>rs12401738</b> | 1  | 78219349  | FUBP1     | A | G | 0.0211 | 1.145E-10   |
| <b>rs205262</b>   | 6  | 34671142  | C6orf106  | G | A | 0.0221 | 1.753E-10   |
| <b>rs12016871</b> | 13 | 26915782  | MTIF3     | T | C | 0.0298 | 2.291E-10   |
| <b>rs12940622</b> | 17 | 76230166  | RPTOR     | G | A | 0.0182 | 2.494E-09   |
| <b>rs11847697</b> | 14 | 29584863  | PRKD1     | T | C | 0.0492 | 3.99E-09    |
| <b>rs2075650</b>  | 19 | 50087459  | TOMM40    | A | G | 0.0258 | 1.247E-08   |
| <b>rs2121279</b>  | 2  | 142759755 | LRP1B     | T | C | 0.0245 | 2.313E-08   |
| <b>rs29941</b>    | 19 | 39001372  | KCTD15    | G | A | 0.0182 | 2.407E-08   |
| <b>rs6091540</b>  | 20 | 50521269  | ZFP64     | C | T | 0.0188 | 8.024E-08   |
| <b>rs7715256</b>  | 5  | 153518086 | GALNT10   | G | T | 0.0163 | 1.695E-07   |
| <b>rs2176040</b>  | 2  | 226801046 | LOC646736 | A | G | 0.0141 | 0.000006058 |
| <b>rs657452</b>   | 1  | 49362434  | AGBL4     | A | G | 0.0227 | 5.482E-13   |
| <b>rs12286929</b> | 11 | 114527614 | CADM1     | G | A | 0.0217 | 1.31E-12    |
| <b>rs7903146</b>  | 10 | 114748339 | TCF7L2    | C | T | 0.0234 | 1.112E-11   |
| <b>rs10132280</b> | 14 | 24998019  | STXBP6    | C | A | 0.023  | 1.141E-11   |
| <b>rs17094222</b> | 10 | 102385430 | HIF1AN    | C | T | 0.0249 | 5.942E-11   |
| <b>rs7599312</b>  | 2  | 213121476 | ERBB4     | G | A | 0.022  | 1.173E-10   |
| <b>rs2365389</b>  | 3  | 61211502  | FHIT      | C | T | 0.02   | 1.629E-10   |
| <b>rs2820292</b>  | 1  | 200050910 | NAV1      | C | A | 0.0195 | 1.834E-10   |

|                   |    |           |          |   |   |        |           |
|-------------------|----|-----------|----------|---|---|--------|-----------|
| <b>rs12885454</b> | 14 | 28806589  | PRKD1    | C | A | 0.0207 | 1.943E-10 |
| <b>rs16851483</b> | 3  | 142758126 | RASA2    | T | G | 0.0483 | 3.548E-10 |
| <b>rs1167827</b>  | 7  | 75001105  | HIP1     | G | A | 0.0202 | 6.333E-10 |
| <b>rs758747</b>   | 16 | 3567359   | NLRC3    | T | C | 0.0225 | 7.473E-10 |
| <b>rs1928295</b>  | 9  | 119418304 | TLR4     | T | C | 0.0188 | 7.91E-10  |
| <b>rs9925964</b>  | 16 | 31037396  | KAT8     | A | G | 0.0192 | 8.108E-10 |
| <b>rs11126666</b> | 2  | 26782315  | KCNK3    | A | G | 0.0207 | 1.332E-09 |
| <b>rs2650492</b>  | 16 | 28240912  | SBK1     | A | G | 0.0207 | 1.915E-09 |
| <b>rs6804842</b>  | 3  | 25081441  | RARB     | G | A | 0.0185 | 2.476E-09 |
| <b>rs4740619</b>  | 9  | 15624326  | C9orf93  | T | C | 0.0179 | 4.564E-09 |
| <b>rs13191362</b> | 6  | 162953340 | PARK2    | A | G | 0.0277 | 7.339E-09 |
| <b>rs3736485</b>  | 15 | 49535902  | DMXL2    | A | G | 0.0176 | 7.412E-09 |
| <b>rs17001654</b> | 4  | 77348592  | SCARB2   | G | C | 0.0306 | 7.76E-09  |
| <b>rs11191560</b> | 10 | 104859028 | NT5C2    | C | T | 0.0308 | 8.446E-09 |
| <b>rs1528435</b>  | 2  | 181259207 | UBE2E3   | T | C | 0.0178 | 1.196E-08 |
| <b>rs1000940</b>  | 17 | 5223976   | RABEP1   | G | A | 0.0192 | 1.284E-08 |
| <b>rs2033529</b>  | 6  | 40456631  | TDRG1    | G | A | 0.019  | 1.388E-08 |
| <b>rs11583200</b> | 1  | 50332407  | ELAVL4   | C | T | 0.0177 | 1.479E-08 |
| <b>rs9400239</b>  | 6  | 109084356 | FOXO3    | C | T | 0.0188 | 1.613E-08 |
| <b>rs10733682</b> | 9  | 128500735 | LMX1B    | A | G | 0.0174 | 1.83E-08  |
| <b>rs11688816</b> | 2  | 62906552  | EHBP1    | G | A | 0.0172 | 1.893E-08 |
| <b>rs11057405</b> | 12 | 121347850 | CLIP1    | G | A | 0.0307 | 2.019E-08 |
| <b>rs11727676</b> | 4  | 145878514 | HHIP     | T | C | 0.0358 | 2.55E-08  |
| <b>rs3849570</b>  | 3  | 81874802  | GBE1     | A | C | 0.0188 | 2.601E-08 |
| <b>rs6477694</b>  | 9  | 110972163 | EPB41L4B | C | T | 0.0174 | 2.673E-08 |
| <b>rs7899106</b>  | 10 | 87400884  | GRID1    | G | A | 0.0395 | 2.96E-08  |

|                   |    |           |              |   |   |        |             |
|-------------------|----|-----------|--------------|---|---|--------|-------------|
| <b>rs2176598</b>  | 11 | 43820854  | HSD17B12     | T | C | 0.0198 | 2.971E-08   |
| <b>rs2245368</b>  | 7  | 76446079  | DTX2P1       | C | T | 0.0317 | 3.187E-08   |
| <b>rs17724992</b> | 19 | 18315825  | PGPEP1       | A | G | 0.0194 | 3.415E-08   |
| <b>rs7243357</b>  | 18 | 55034299  | GRP          | T | G | 0.0217 | 3.857E-08   |
| <b>rs1808579</b>  | 18 | 19358886  | C18orf8      | C | T | 0.0167 | 4.169E-08   |
| <b>rs2033732</b>  | 8  | 85242264  | RALYL        | C | T | 0.0192 | 4.889E-08   |
| <b>rs1441264</b>  | 13 | 78478920  | MIR548A2     | A | G | 0.0175 | 6.037E-08   |
| <b>rs2080454</b>  | 16 | 47620091  | CBLN1        | C | A | 0.0168 | 6.547E-08   |
| <b>rs7164727</b>  | 15 | 70881044  | LOC100287559 | T | C | 0.018  | 6.829E-08   |
| <b>rs17203016</b> | 2  | 207963763 | CREB1        | G | A | 0.021  | 8.145E-08   |
| <b>rs977747</b>   | 1  | 47457264  | TAL1         | T | G | 0.0167 | 8.652E-08   |
| <b>rs9914578</b>  | 17 | 1951886   | SMG6         | G | C | 0.0201 | 8.99E-08    |
| <b>rs9374842</b>  | 6  | 120227364 | LOC285762    | T | C | 0.0187 | 9.673E-08   |
| <b>rs16907751</b> | 8  | 81538012  | ZBTB10       | C | T | 0.035  | 1.255E-07   |
| <b>rs9540493</b>  | 13 | 65103705  | MIR548X2     | A | G | 0.0172 | 1.416E-07   |
| <b>rs7239883</b>  | 18 | 38401669  | LOC284260    | G | A | 0.0164 | 1.633E-07   |
| <b>rs13201877</b> | 6  | 137717234 | IFNGR1       | G | A | 0.0233 | 2.348E-07   |
| <b>rs2836754</b>  | 21 | 39213610  | ETS2         | C | T | 0.0164 | 4.161E-07   |
| <b>rs492400</b>   | 2  | 219057996 | USP37        | C | T | 0.0158 | 4.167E-07   |
| <b>rs9641123</b>  | 7  | 93035668  | CALCR        | C | G | 0.0191 | 0.0000005   |
| <b>rs1460676</b>  | 2  | 164275935 | FIGN         | C | T | 0.0197 | 8.982E-07   |
| <b>rs4787491</b>  | 16 | 29922838  | INO80E       | G | A | 0.0159 | 0.000002241 |
| <b>rs6465468</b>  | 7  | 95007450  | ASB4         | T | G | 0.0166 | 0.000002318 |

Beta refers to the association of each variant with body mass index. Abbreviations: BMI, body mass index; Chr, chromosome; SNP, single nucleotide polymorphism.

| <b>Supplemental Table 3.</b> Individual variant association in CAMP-MGH cohort with insulin-30 |                     |                               |                     |             |           |                |
|------------------------------------------------------------------------------------------------|---------------------|-------------------------------|---------------------|-------------|-----------|----------------|
| <b>SNP</b>                                                                                     | <b>Nearest gene</b> | <b>Insulin raising allele</b> | <b>Other allele</b> | <b>beta</b> | <b>SE</b> | <b>P-value</b> |
| rs1111875                                                                                      | HHEX                | T                             | C                   | 0.06        | 0.02      | 0.01           |
| rs2287019                                                                                      | QPCTL               | C                             | T                   | 0.05        | 0.03      | 0.08           |
| rs742642                                                                                       | CDKAL1              | G                             | A                   | 0.09        | 0.03      | 0.01           |
| rs6943153                                                                                      | GRB10               | T                             | C                   | -0.03       | 0.02      | 0.17           |
| rs10830963                                                                                     | MTNR1B              | C                             | G                   | 0.06        | 0.03      | 0.03           |
| rs6006427                                                                                      | OSM                 | C                             | T                   | 0.01        | 0.03      | 0.82           |
| rs4942511                                                                                      | C13orf18            | C                             | T                   | -0.13       | 0.08      | 0.12           |
| rs10233248                                                                                     | VWC2                | A                             | T                   | -0.03       | 0.03      | 0.27           |
| rs17044912                                                                                     | AF279782            | C                             | T                   | 0.05        | 0.09      | 0.57           |
| rs2274611                                                                                      | CTSL                | C                             | T                   | 0.04        | 0.02      | 0.09           |
| rs6740210                                                                                      | SLC1A4              | T                             | C                   | 0.04        | 0.04      | 0.36           |
| rs2865851                                                                                      | MIR519D             | G                             | A                   | -0.01       | 0.02      | 0.71           |
| rs7581860                                                                                      | PARD3B              | A                             | G                   | 0.07        | 0.04      | 0.12           |
| rs918689                                                                                       | CNTNAP4             | G                             | A                   | 0.03        | 0.03      | 0.19           |
| rs11240131                                                                                     | NBPF1<br>/KIAA1693  | C                             | T                   | -0.03       | 0.03      | 0.41           |
| rs2388417                                                                                      | LINC01579           | T                             | C                   | 0.10        | 0.10      | 0.29           |
| rs1239081                                                                                      | AC092660            | G                             | A                   | -0.04       | 0.02      | 0.09           |
| rs10834748                                                                                     | LUZP2               | A                             | T                   | 0.00        | 0.03      | 0.90           |
| rs3759356                                                                                      | KCNA5               | A                             | G                   | -0.02       | 0.03      | 0.46           |
| rs13152357                                                                                     | RP11-<br>73G16      | C                             | T                   | 0.05        | 0.06      | 0.42           |
| rs1265052                                                                                      | C6ORF15             | C                             | T                   | 0.05        | 0.02      | 0.03           |
| rs210328                                                                                       | AL163953            | C                             | T                   | 0.04        | 0.03      | 0.14           |
| rs7607980                                                                                      | COBLL1              | T                             | C                   | 0.01        | 0.03      | 0.74           |
| rs11768772                                                                                     | RN7SKP228           | G                             | C                   | 0.02        | 0.05      | 0.72           |
| rs2909874                                                                                      | NKX6-3              | A                             | G                   | 0.02        | 0.02      | 0.47           |
| rs7046518                                                                                      | NBPF22P             | A                             | G                   | 0.01        | 0.03      | 0.75           |
| rs4918546                                                                                      | ACER2               | G                             | T                   | -0.01       | 0.03      | 0.84           |
| rs368664                                                                                       | RN7SL686P           | A                             | C                   | 0.07        | 0.06      | 0.28           |
| rs1073923                                                                                      | C1orf115            | T                             | C                   | 0.00        | 0.05      | 0.98           |
| rs11675522                                                                                     | WVOX                | T                             | C                   | 0.02        | 0.02      | 0.50           |
| rs925820                                                                                       | AC019118            | T                             | G                   | 0.02        | 0.02      | 0.33           |
| rs16877965                                                                                     | CNTN4               | A                             | G                   | 0.02        | 0.06      | 0.73           |
| rs9364646                                                                                      | WRN                 | A                             | G                   | 0.02        | 0.03      | 0.58           |
| rs7573433                                                                                      | PARK2               | A                             | G                   | -0.01       | 0.04      | 0.87           |
| rs6601952                                                                                      | SCN2A               | C                             | A                   | 0.00        | 0.02      | 0.84           |
| rs7100825                                                                                      | UCN3                | T                             | C                   | 0.04        | 0.04      | 0.30           |
| rs987192                                                                                       | CR607950            | T                             | C                   | -0.02       | 0.05      | 0.68           |
| rs10811661                                                                                     | NQO2                | C                             | T                   | 0.01        | 0.03      | 0.86           |
| rs12549902                                                                                     | ANK1                | G                             | A                   | 0.02        | 0.02      | 0.52           |
| rs933360                                                                                       | GRB10               | G                             | A                   | -0.03       | 0.03      | 0.32           |
| rs4502156                                                                                      | C2CD4A              | C                             | T                   | 0.01        | 0.02      | 0.69           |



Beta refers to the association of each variant with log-insulin 30. Abbreviations: SE, standard error.

**Supplemental table 4.**

Summary of bidirectional Mendelian randomization analyses.

| Instrument Set         | Exposure Data | Outcome Data | MR Beta | MR SE | MR P-value | Het. P-value | Egger Test P-value |
|------------------------|---------------|--------------|---------|-------|------------|--------------|--------------------|
| Insulin-30 Stringent   | MAGIC         | GIANT        | 0.095   | 0.013 | 1.8E-12    | 2.7E-07      | 5.9E-01            |
| Insulin-30 Stringent   | MAGIC         | UK Biobank   | 0.104   | 0.016 | 1.3E-10    | 2.2E-05      | 4.4E-01            |
| Insulin-30 Stringent   | MAGIC         | Combined     | 0.098   | 0.010 | 2.2E-21    | 7.6E-12      | 5.3E-01            |
| GSIS Stringent         | MAGIC         | GIANT        | 0.055   | 0.011 | 8.5E-07    | 2.7E-11      | 2.5E-01            |
| GSIS Stringent         | MAGIC         | UK Biobank   | 0.054   | 0.013 | 6.6E-05    | 8.8E-11      | 3.1E-01            |
| GSIS Stringent         | MAGIC         | Combined     | 0.054   | 0.009 | 3.4E-10    | 3.6E-22      | 2.7E-01            |
| Insulin-30 Relaxed     | MAGIC         | GIANT        | 0.010   | 0.004 | 2.0E-02    | 5.3E-10      | 8.7E-01            |
| Insulin-30 Relaxed     | MAGIC         | UK Biobank   | 0.004   | 0.004 | 3.1E-01    | 1.9E-09      | 9.0E-01            |
| Insulin-30 Relaxed     | MAGIC         | Combined     | 0.007   | 0.003 | 1.8E-02    | 7.3E-23      | 9.2E-01            |
| Insulin-30 Sensitivity | MAGIC         | GIANT        | 0.042   | 0.017 | 1.1E-02    | 8.3E-01      | NA                 |
| Insulin-30 Sensitivity | MAGIC         | UK Biobank   | 0.050   | 0.020 | 1.4E-02    | 2.3E-01      | NA                 |
| Insulin-30 Sensitivity | MAGIC         | Combined     | 0.045   | 0.013 | 4.2E-04    | 3.4E-01      | NA                 |
| BMI                    | GIANT         | MAGIC        | 0.115   | 0.145 | 4.3E-01    | 1.3E-01      | 1.7E-01            |

MR-Beta refers to the effect of genetically-raised insulin-30 on BMI for the insulin-30 instrument sets, and the effect of genetically-raised BMI on insulin-30. Abbreviations: het., heterogeneity; GIANT, Genetic Investigation of ANthropometric Traits consortium, MAGIC, Meta-Analysis of Glucose- and Insulin-related traits Consortium; MR, Mendelian randomization; SE, standard error.

## Figure legend

**Supplemental Figure 1. SNP-trait effect estimates for insulin-30-stringent instruments.** Scatterplot of association of each variant with insulin-30 and with body mass index. The dashed line represents the slope of the MR effect estimate of genetically-raised insulin 30 on BMI using all 3 instruments; the dotted line is the MR effect estimate excluding the outlier, QPCTL/GIPR. Abbreviations: MR, Mendelian randomization; SD, standard deviation; SE, standard error; SNP, single nucleotide polymorphism.

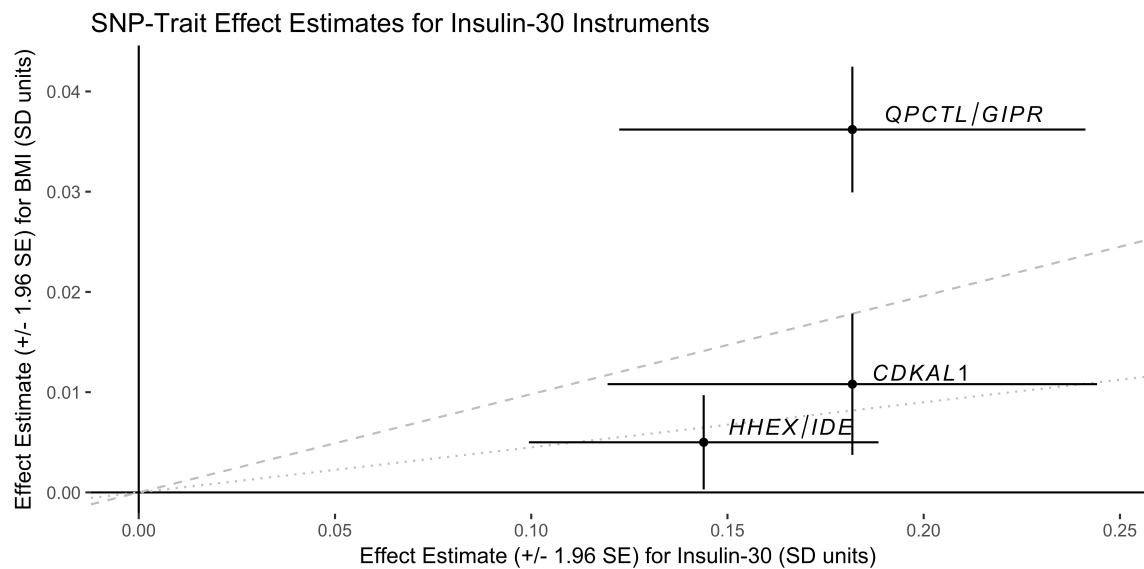

Supplement: NIHMS961570-supplement-SUP.pdf [file NIHMS961570-supplement-SUP.pdf]
